# Supplementary material for: Cold atmospheric plasma driven self-assembly in serum proteins: insights into the protein aggregation to biomaterials
Source: Royal Society of Chemistry journal article supplement (doi:10.1039/d2ra04318a), 2022-01-01
Supplement: d2ra04318a1.pdf [file d2ra04318a1.pdf]

### **Supplementary Information**

#### **Cold atmospheric plasma driven self-assembly in serum proteins: Insights into the protein aggregation to biomaterials**

Rakesh Ruchel Khanikar<sup>†a</sup>, Parismita Kalita<sup>†a</sup>, Monika Narzary<sup>a</sup>, Deepjyoti Basumatary<sup>a</sup>, Ashim Jyoti Bharati<sup>a</sup>, Anurag Priyadarshi<sup>b</sup>, Heremba Bailung<sup>a</sup>, Kamatchi Sankaranarayanan<sup>a\*</sup>

<sup>a</sup>Physical Sciences Division, Institute of Advanced Study in Science and Technology, (An Autonomous Institute Under DST, Govt. of India), Vigyan Path, Paschim Boragaon, Garchuk, Guwahati, Assam 781035, India.

<sup>b</sup>Department of Biosciences and Bioengineering, Indian Institute of Technology Guwahati, Guwahati 781039, Assam, India

<sup>†</sup>Contributed Equally

Authors for Correspondence

**K. Sankaranarayanan**

Biophysics - Physical Sciences Division, Institute of Advanced Study in Science and Technology, (An Autonomous Institute Under DST, Govt. of India), Vigyan Path, Paschim Boragaon, Garchuk, Guwahati, Assam 781035, India.

Email: [kamatchi.sankaran@gmail.com](mailto:kamatchi.sankaran@gmail.com)

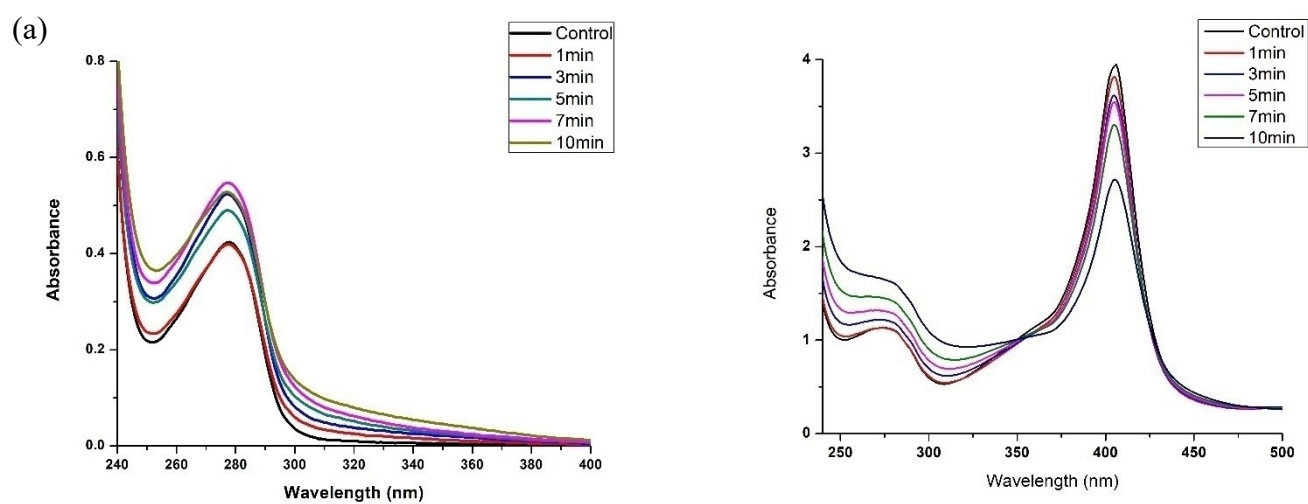

Figure S1 Ultra-Violet Visible Spectroscopy of control and plasma treated (a) BSA and (b) Hb

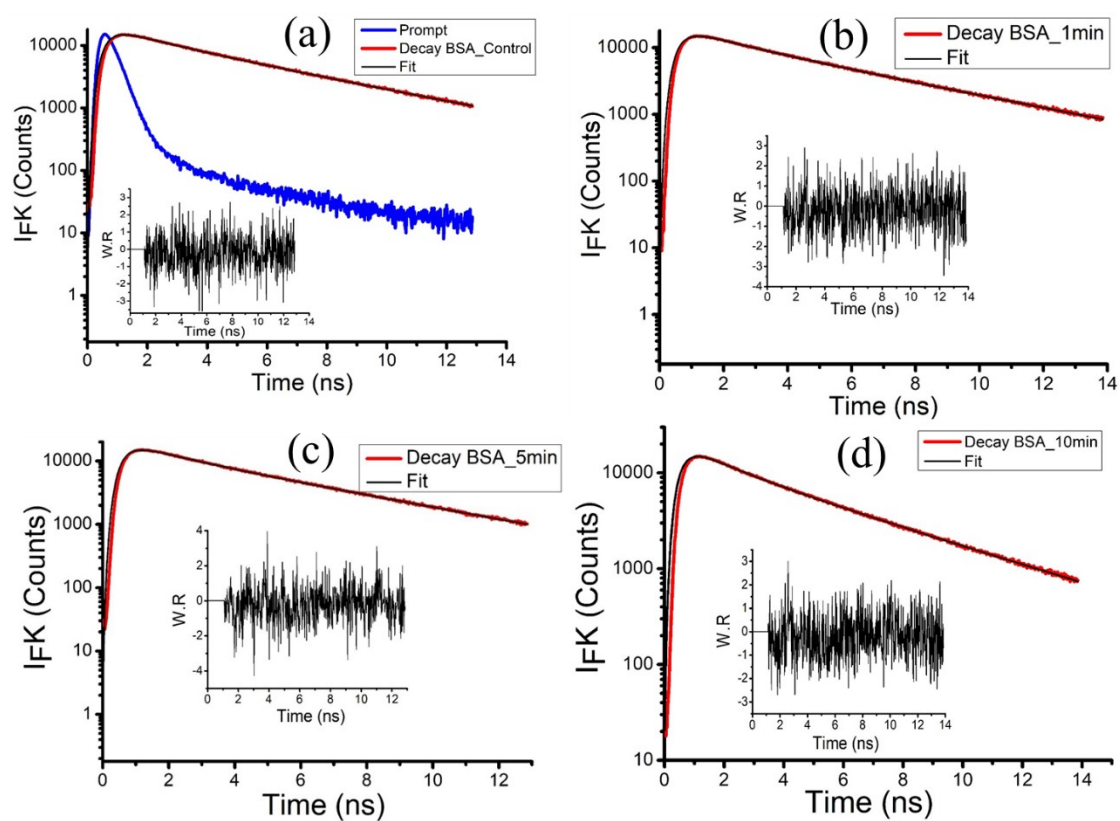

Fig S2: Time resolved spectra of BSA and CAP treated BSA

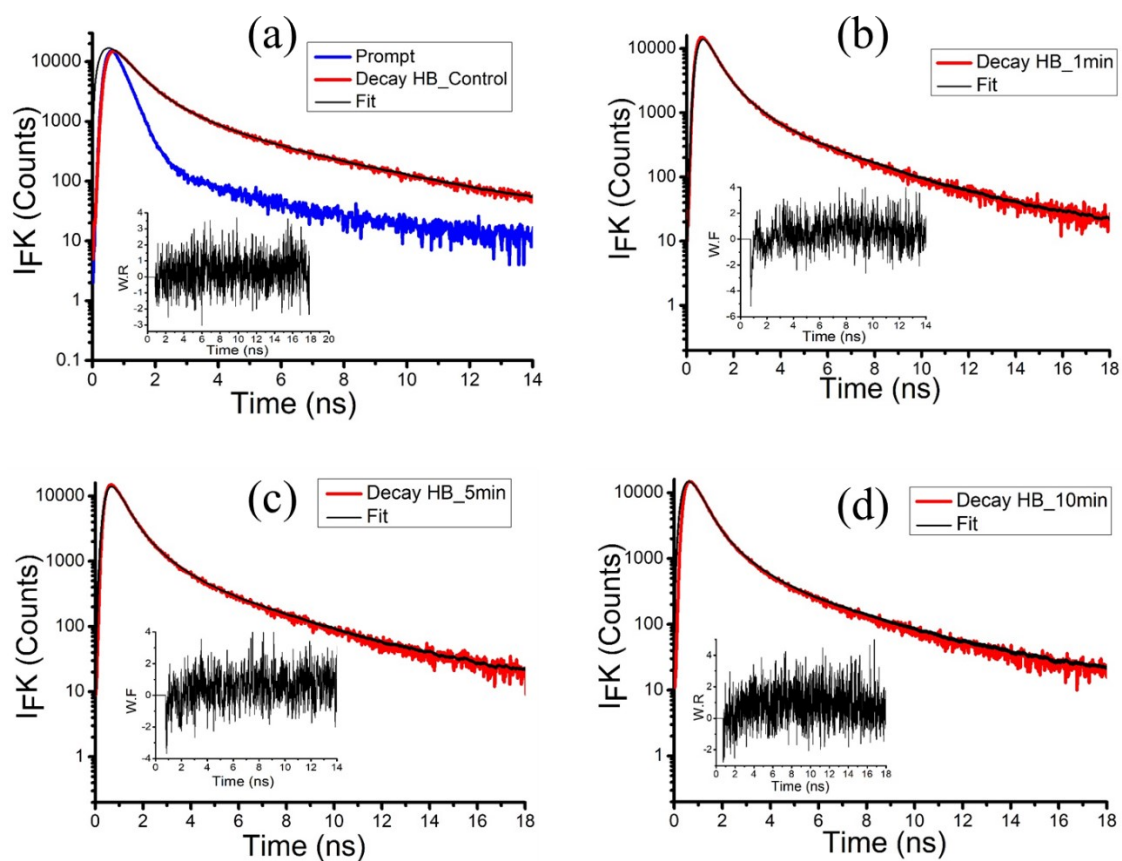

Fig S3: Time resolved spectra of Hb and CAP treated Hb

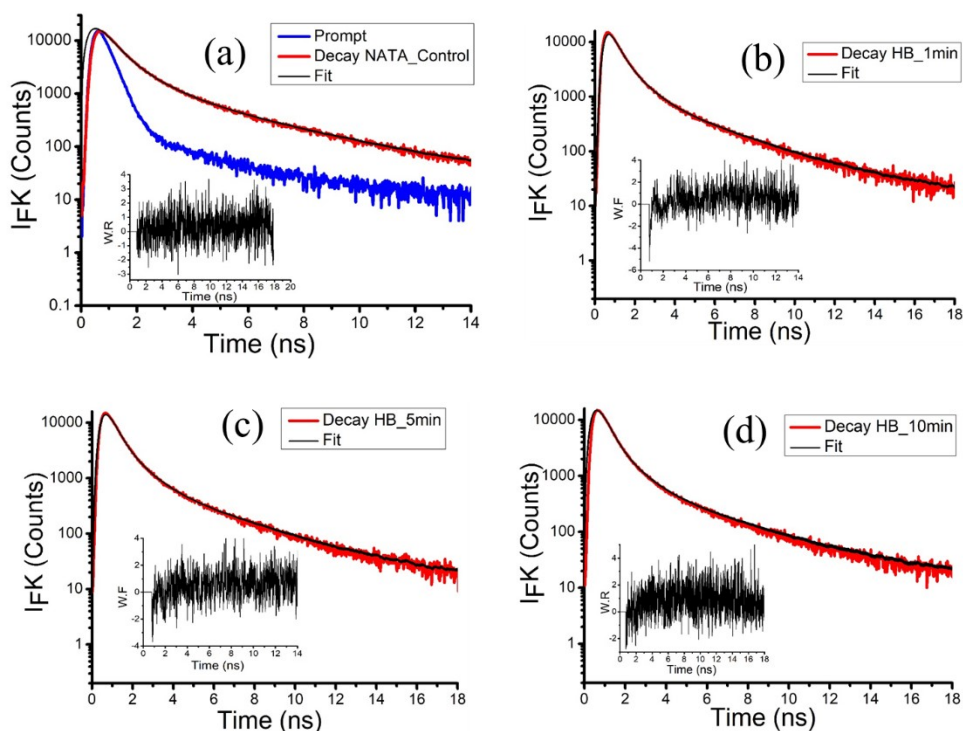

Fig S4: Time resolved spectra of NATA and CAP treated NATA

**Table S1 - Lifetime of BSA at different time of plasma treatment**

| Treatment time (Min) | $\tau_1$ (ns)     | % population | $\tau_2$ (ns)     | % population |
|----------------------|-------------------|--------------|-------------------|--------------|
| 0                    | $2.170 \pm 0.009$ | 27.30        | $6.217 \pm 0.004$ | 72.70        |
| 1                    | $2.117 \pm 0.008$ | 29.74        | $6.280 \pm 0.004$ | 70.26        |
| 3                    | $2.085 \pm 0.008$ | 29.39        | $6.327 \pm 0.004$ | 70.61        |
| 5                    | $2.058 \pm 0.008$ | 29.59        | $6.258 \pm 0.004$ | 70.41        |
| 7                    | $2.092 \pm 0.008$ | 31.34        | $6.250 \pm 0.004$ | 68.66        |
| 10                   | $2.048 \pm 0.007$ | 32.54        | $6.064 \pm 0.003$ | 67.46        |

**Table S2 - Lifetime of Hb at different time of plasma treatment**

| Treatment Time (Min) | $\tau_1$ (ns)     | % population | $\tau_2$ (ns)     | % population | $\tau_3$ (ns)     | % population |
|----------------------|-------------------|--------------|-------------------|--------------|-------------------|--------------|
| 0                    | $0.418 \pm 0.001$ | 73.97        | $1.263 \pm 0.002$ | 22.87        | $4.418 \pm 0.009$ | 3.17         |
| 1                    | $0.212 \pm 0.000$ | 86.50        | $1.201 \pm 0.002$ | 11.17        | $4.598 \pm 0.010$ | 1.45         |
| 3                    | $0.216 \pm 0.001$ | 84.50        | $1.184 \pm 0.002$ | 14.30        | $4.658 \pm 0.011$ | 1.60         |
| 5                    | $0.260 \pm 0.001$ | 84.65        | $1.207 \pm 0.002$ | 13.84        | $4.653 \pm 0.012$ | 1.53         |
| 7                    | $0.268 \pm 0.001$ | 83.35        | $1.163 \pm 0.002$ | 15.80        | $4.586 \pm 0.012$ | 1.55         |
| 10                   | $0.280 \pm 0.001$ | 85.95        | $1.198 \pm 0.002$ | 12.26        | $4.672 \pm 0.012$ | 1.35         |

**Table S3 - Lifetime of NATA at different time of plasma treatment**

| Treatment Time (min) | $\tau_1$ (ns)     | % population |
|----------------------|-------------------|--------------|
| 0                    | $3.153 \pm 0.002$ | 100          |
| 1                    | $3.125 \pm 0.002$ | 100          |
| 5                    | $3.070 \pm 0.002$ | 100          |
| 10                   | $3.022 \pm 0.002$ | 100          |

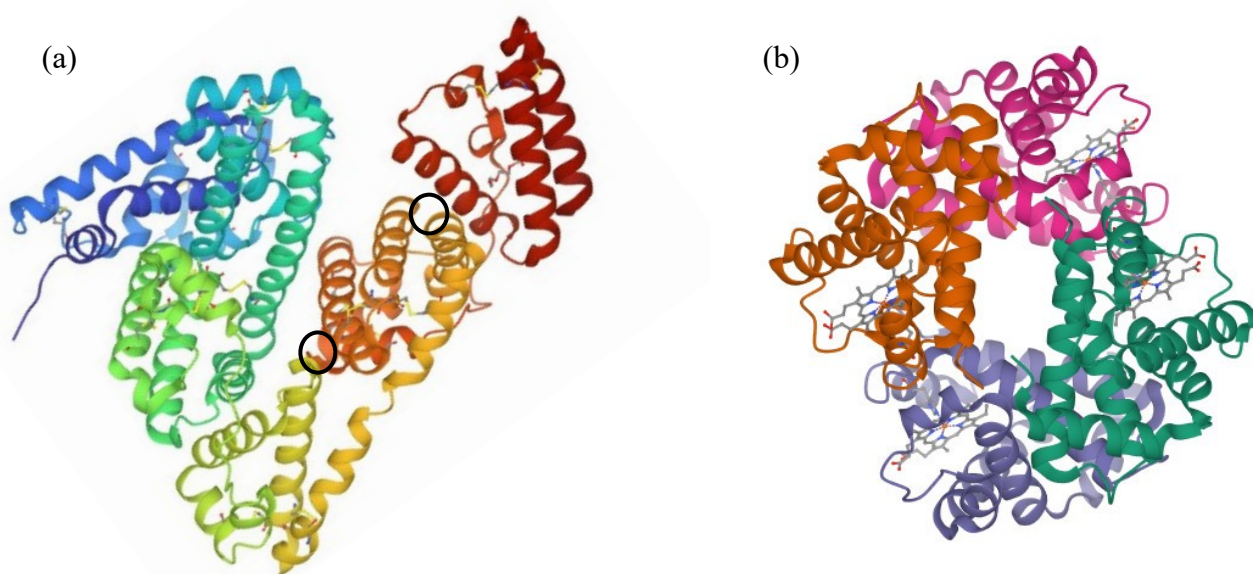

Figure S5 - Structure of (a) BSA with the Trp located in the position 213 and 134 marked in black circles. (Ref: PDB 4F5S) (b) Hemoglobin with the porphyrins and the six tryptophan residues ( $\alpha$ 14,  $\beta$ 15 and  $\beta$ 37 in each dimer) Ref: 1HDA.
